# Supplementary material for: Alterations in the Human Plasma Lipidome in Response to Tularemia Vaccination
Source: MDPI journal article supplement (doi:10.3390/vaccines8030414), 2020-07-24
Supplement: s1 [file s1]

# Alterations in the Human Plasma Lipidome in Response to Tularemia Vaccination

**Supplementary Table S1.** *Subject Demographics.*

| Category  | Sub-Category               | DVC-LVS<br>(N=10) |
|-----------|----------------------------|-------------------|
| Gender    | Female                     | 5 (50%)           |
|           | Male                       | 5 (50%)           |
| Race      | Black / African American   | 3 (30%)           |
|           | White                      | 7 (70%)           |
| Ethnicity | Non-Hispanic or Non-Latino | 10 (100%)         |
| Age       | Mean (S.D.)                | 27.3 (6.3)        |
|           | Median                     | 26                |
|           | Range                      | 22.7, 44.1        |

**Supplementary Table S2.** *Table of Lipidomics Standards.* The following synthetic standards were used to optimize instrumental parameters and also for quantification of patient plasma samples.

| OXY Standards                |                                            |               |
|------------------------------|--------------------------------------------|---------------|
| Lipid Abbrev.                | Lipid Species                              | Conc. (pg/ml) |
| OEA                          | Oleoylethanolamide                         | 14.2          |
| AEA                          | Arachidonylethanolamine                    | 28.4          |
| PGE2 EA                      | Prostaglandin E2 Ethanolamide              | 11.4          |
| PGF2a EA                     | Prostaglandin F2a Ethanolamide             | 14.2          |
|                              | 12(13)-EpOME/13-HODE                       |               |
| 12(13) EpOME                 | 12(13)epoxy-9-octadecenoic acid            | 1.1           |
| 13 HODE                      | 13-hydroxy-9,11-octadecadienoic acid       | 1.4           |
| 9,10 DIHOME                  | 9,10-dihydroxy-12-octadecenoic acid        | 1.1           |
| TBX2                         | Thromboxane B2                             | 11.4          |
| 12 HETE                      | 12-hydroxy-5,8,10,14-eicosatetraenoic acid | 1.1           |
|                              | 9-HETE/11(12)-EET                          |               |
| 9 HETE                       | 9-hydroxy-5,7,11,14-eicosatetraenoic acid  | 1.1           |
| 11(12) EET                   | 11(12)-epoxy-5,8,14-eicosatrienoic acid    | 1.1           |
| 20 HETE                      | 20-hydroxy-5,8,11,14-eicosatetraenoic acid | 1.1           |
| 5 HETE                       | 5-hydroxy-6,8,11,14-eicosatetraenoic acid  | 1.1           |
| 8(9) EET                     | 8(9)-epoxy-5,11,14-eicosatrienoic acid     | 1.1           |
|                              | 14(15)-epoxy-5,8,11-eicosatrienoic acid    | 1.1           |
|                              | Summed DHET Species                        |               |
| 14,15 DHET                   | 14,15-dihydroxy-5,8,11-eicosatrienoic acid | 1.1           |
| 11,12 DHET                   | 11,12-dihydroxy-5,8,14-eicosatrienoic acid | 1.1           |
| 8,9 DHET                     | 8,9-dihydroxy-5,11,14-eicosatrienoic acid  | 1.1           |
| 5,6 DHET                     | 5,6-dihydroxy-8,11,14-eicosatrienoic acid  | 1.1           |
| Shotgun Lipidomics Standards |                                            |               |
| Lipid                        | Lipid Class                                | [Conc; ug/ul] |

|            |                              |      |
|------------|------------------------------|------|
| di20:0 PC  | Phosphatidylcholine          | 60.0 |
| di14:0 PE  | Phosphatidylethanolamine     | 1.0  |
| 17:0 SM    | Spingomyelin                 | 4.0  |
| di20:0 DG  | Diacylglycerol               | 4.0  |
| 17:0 FFA   | Free Fatty Acid              | 1.0  |
| Tri17:1 TG | Triacylglycerol              | 10.0 |
| di14:0 PS  | Phosphatidylserine           | 0.1  |
| 17:0 LPC   | Lysophosphatidylcholine      | 2.5  |
| 14:0 LPE   | Lysophosphatidylethanolamine | 0.1  |

**Supplementary Table S3.** *Table of instrumental parameters.* A list of optimized instrumental parameters used to conduct targeted lipidomics studies at EMO and SLU laboratories, respectively.

| EMO Instrumental Parameters |        |                               |        |
|-----------------------------|--------|-------------------------------|--------|
| Curtain Gas (CUR)           | 25.00  | Collision Gas (CAD)           | Low    |
| ESI Voltage (IS)            | -3500  | Gas Source 1 (GS1)            | 55.00  |
| ESI Temp (TEM)              | 650°C  | Gas Source 2 (GS2)            | 50.00  |
| Declustering Potential (DP) | -90.00 | Collision Energy (CE)         | -40.00 |
| Entrance Potential (EP)     | -10.00 | Collision Energy Spread (CES) | 0.00   |
| Q1 and Q3 Resolution        | Unit   | Step Size                     | 0.2Da  |

| SLU Instrumental Parameters                          |       |               |               |
|------------------------------------------------------|-------|---------------|---------------|
| Curtain Gas (CUR)                                    | 20.00 | Sheath Gas    | 12 arb. units |
| ESI Voltage (IS)                                     | 3500  | Ion Sweep Gas | 1 arb. Units  |
| Capillary Temp.                                      | 270°C | Auxillary Gas | 2 arb. units  |
| Collision Pressure (Argon) 1 atm Capillary Offset 35 |       |               |               |

**Supplementary Table S4.** *Table of serum cytokines serum samples.* A list of the cytokines measured and represented in Figure 6.

**Figure 6 Cytokines and Abbreviations**

|                        |                                            |                                               |                                                           |                                         |                                           |
|------------------------|--------------------------------------------|-----------------------------------------------|-----------------------------------------------------------|-----------------------------------------|-------------------------------------------|
| EOTAXIN                | basic fibroblast growth factor (FGF-BASIC) | granulocyte colony-stimulating factor (G CSF) | granulocyte-macrophage colony stimulating factor (GM CSF) | interferon gamma (IFN- $\gamma$ )       | tumor necrosis factor alpha (TNF-a)       |
| interleukin 10 (IL-10) | interleukin 10 (IL-10)                     | interleukin 13 (IL-13)                        | interleukin 17 (IL-17)                                    | interleukin 1 receptor agonist (IL-1RA) | vascular endothelial growth factor (VEGF) |
| interleukin 2 (IL-2)   | interleukin 4 (IL-4)                       | interleukin 5 (IL-5)                          | interleukin 8 (IL-8)                                      | interleukin 9 (IL-9)                    | interleukin 10 (IP-10)                    |

|                                                                                                            |                                                      |                                                      |        |
|------------------------------------------------------------------------------------------------------------|------------------------------------------------------|------------------------------------------------------|--------|
| monocyte<br>chemoattractant<br>protein-1/monocyte<br>chemotactic and<br>activating factor (MCP-<br>1/MCAF) | macrophage<br>inflammatory<br>protein 1b<br>(MIP 1B) | platelet<br>derived<br>growth factor<br>BB (PDGF BB) | RANTES |
|------------------------------------------------------------------------------------------------------------|------------------------------------------------------|------------------------------------------------------|--------|

**Supplementary Table S5.** *Table of positively identified targeted lipids in serum samples.* A list of all of the identified targeted lipids are shown in this table with corresponding mass to charge (m/z) value and lipid scan type/experiment.

| Tularemia Lipid ID | Lipid Species         | Scan | m/z   |
|--------------------|-----------------------|------|-------|
| TULIPID001         | OEA                   | MRM  | 326.0 |
| TULIPID002         | AEA                   | MRM  | 348.0 |
| TULIPID003         | PGE2 Ethanolamide     | MRM  | 378.0 |
| TULIPID004         | PGF2a Ethanolamide    | MRM  | 380.0 |
| TULIPID005         | 12(13)-EpOME; 13-HODE | MRM  | 169.0 |
| TULIPID006         | 9,10 DIHOME           | MRM  | 173.0 |
| TULIPID007         | Summed DHET Species   | MRM  | NA    |
| TULIPID008         | TXB2                  | MRM  | 147.0 |
| TULIPID009         | 12-HETE               | MRM  | 87.0  |
| TULIPID010         | 9-HETE; 11(12)-EET    | MRM  | 167.0 |
| TULIPID011         | 20-HETE               | MRM  | 289.0 |
| TULIPID012         | 5-HETE                | MRM  | 301.0 |
| TULIPID013         | 8(9)-EET              | MRM  | 70.0  |
| TULIPID014         | 14(15)-EET            | MRM  | 220.0 |
| TULIPID015         | 14:0 LPC              | NL50 | 502.5 |
| TULIPID016         | 15:0 LPC              | NL50 | 516.4 |
| TULIPID017         | 16:1 LPC              | NL50 | 528.4 |
| TULIPID018         | 16:0 LPC              | NL50 | 530.4 |
| TULIPID019         | 17:0 LPC              | NL50 | 544.4 |
| TULIPID020         | 18:2 LPC              | NL50 | 554.4 |
| TULIPID021         | 18:1 LPC              | NL50 | 556.4 |
| TULIPID022         | 18:0 LPC              | NL50 | 558.4 |
| TULIPID023         | 20:4 LPC              | NL50 | 578.4 |
| TULIPID024         | 20:3 LPC              | NL50 | 580.4 |
| TULIPID025         | 22:6 LPC              | NL50 | 602.4 |
| TULIPID026         | 22:5 LPC              | NL50 | 604.3 |
| TULIPID027         | 30:2 PC               | NL50 | 736.7 |
| TULIPID028         | 30:1 PC               | NL50 | 738.7 |
| TULIPID029         | 30:0 PC               | NL50 | 740.6 |
| TULIPID030         | 32:1e PC              | NL50 | 752.7 |
| TULIPID031         | 32:0e PC              | NL50 | 754.9 |
| TULIPID032         | 32:1 PC               | NL50 | 766.7 |
| TULIPID033         | 32:0 PC               | NL50 | 768.6 |
| TULIPID034         | 34:1p PC              | NL50 | 778.7 |
| TULIPID035         | 34:0p PC              | NL50 | 780.6 |
| TULIPID036         | 34:3 PC               | NL50 | 790.7 |
| TULIPID037         | 34:2 PC               | NL50 | 792.7 |
| TULIPID038         | 34:1 PC               | NL50 | 794.7 |
| TULIPID039         | 34:0 PC               | NL50 | 796.7 |
| TULIPID040         | 36:3p PC              | NL50 | 802.7 |
| TULIPID041         | 36:4 PC               | NL50 | 816.6 |
| TULIPID042         | 36:3 PC               | NL50 | 818.7 |
| TULIPID043         | 36:2 PC               | NL50 | 820.7 |
| TULIPID044         | 36:1 PC               | NL50 | 822.7 |

|            |          |         |       |
|------------|----------|---------|-------|
| TULIPID045 | 38:4p PC | NL50    | 828.6 |
| TULIPID046 | 38:6 PC  | NL50    | 840.6 |
| TULIPID047 | 38:5 PC  | NL50    | 842.6 |
| TULIPID048 | 38:4 PC  | NL50    | 844.7 |
| TULIPID049 | 38:3 PC  | NL50    | 846.7 |
| TULIPID050 | 38:2 PC  | NL50    | 848.8 |
| TULIPID051 | 38:1 PC  | NL50    | 850.7 |
| TULIPID052 | 38:0 PC  | NL50    | 852.6 |
| TULIPID053 | 40:0e PC | NL50    | 866.8 |
| TULIPID054 | 40:6 PC  | NL50    | 868.7 |
| TULIPID055 | 40:5 PC  | NL50    | 870.7 |
| TULIPID056 | 40:0 PC  | NL50    | 880.8 |
| TULIPID057 | 34:2 PI  | PREC241 | 833.4 |
| TULIPID058 | 34:1 PI  | PREC241 | 835.5 |
| TULIPID059 | 36:4 PI  | PREC241 | 857.7 |
| TULIPID060 | 36:2 PI  | PREC241 | 861.6 |
| TULIPID061 | 36:1 PI  | PREC241 | 862.8 |
| TULIPID062 | 38:5 PI  | PREC241 | 883.6 |
| TULIPID063 | 38:4 PI  | PREC241 | 885.7 |
| TULIPID064 | 38:3 PI  | PREC241 | 887.0 |
| TULIPID065 | 38:2 PI  | PREC241 | 888.0 |
| TULIPID066 | 16:0 Cer | NL256   | 536.6 |
| TULIPID067 | 18:1 Cer | NL256   | 562.0 |
| TULIPID068 | 18:0 Cer | NL256   | 564.6 |
| TULIPID069 | 20:1 Cer | NL256   | 590.0 |
| TULIPID070 | 20:0 Cer | NL256   | 592.6 |
| TULIPID071 | 22:1 Cer | NL256   | 618.6 |
| TULIPID072 | 22:0 Cer | NL256   | 620.7 |
| TULIPID073 | 23:0 Cer | NL256   | 634.7 |
| TULIPID074 | 24:2 Cer | NL256   | 644.8 |
| TULIPID075 | 24:1 Cer | NL256   | 646.6 |
| TULIPID076 | 24:0 Cer | NL256   | 648.7 |
| TULIPID077 | 14:0 CE  | NL368   | 619.7 |
| TULIPID078 | 16:1 CE  | NL368   | 645.7 |
| TULIPID079 | 16:0 CE  | NL368   | 647.7 |
| TULIPID080 | 18:3 CE  | NL368   | 669.7 |
| TULIPID081 | 18:2 CE  | NL368   | 671.7 |
| TULIPID082 | 18:1 CE  | NL368   | 673.7 |
| TULIPID083 | 18:0 CE  | NL368   | 675.8 |
| TULIPID084 | 20:5 CE  | NL368   | 693.7 |
| TULIPID085 | 20:4 CE  | NL368   | 695.7 |
| TULIPID086 | 22:6 CE  | NL368   | 719.7 |
| TULIPID087 | 22:5 CE  | NL368   | 721.7 |
| TULIPID088 | 22:4 CE  | NL368   | 723.7 |
| TULIPID089 | 22:3 CE  | NL368   | 725.0 |
| TULIPID090 | 22:2 CE  | NL368   | 727.8 |
| TULIPID091 | e32:0 PE | FMOC    | 898.7 |
| TULIPID092 | 32:2 PE  | FMOC    | 908.6 |
| TULIPID093 | 32:1 PE  | FMOC    | 910.7 |
| TULIPID094 | 32:0 PE  | FMOC    | 912.8 |
| TULIPID095 | p34:2 PE | FMOC    | 920.8 |
| TULIPID096 | p34:1 PE | FMOC    | 922.7 |
| TULIPID097 | e34:1 PE | FMOC    | 924.8 |
| TULIPID098 | 34:3 PE  | FMOC    | 934.9 |
| TULIPID099 | 34:2 PE  | FMOC    | 936.8 |
| TULIPID100 | 34:1 PE  | FMOC    | 938.8 |
| TULIPID101 | p36:4 PE | FMOC    | 944.8 |
| TULIPID102 | e36:4 PE | FMOC    | 946.8 |

|            |          |      |        |
|------------|----------|------|--------|
| TULIPID103 | e36:3 PE | FMOC | 948.8  |
| TULIPID104 | e36:2 PE | FMOC | 950.8  |
| TULIPID105 | 36:5 PE  | FMOC | 958.7  |
| TULIPID106 | 36:4 PE  | FMOC | 960.7  |
| TULIPID107 | 36:3 PE  | FMOC | 962.8  |
| TULIPID108 | 36:2 PE  | FMOC | 964.8  |
| TULIPID109 | 36:1 PE  | FMOC | 966.8  |
| TULIPID110 | 36:0 PE  | FMOC | 968.8  |
| TULIPID111 | p38:5 PE | FMOC | 970.8  |
| TULIPID112 | p38:4 PE | FMOC | 972.8  |
| TULIPID113 | e38:4 PE | FMOC | 974.8  |
| TULIPID114 | 38:6 PE  | FMOC | 984.7  |
| TULIPID115 | 38:5 PE  | FMOC | 986.8  |
| TULIPID116 | 38:4 PE  | FMOC | 988.8  |
| TULIPID117 | 38:3 PE  | FMOC | 990.8  |
| TULIPID118 | p40:7 PE | FMOC | 994.8  |
| TULIPID119 | p40:6 PE | FMOC | 996.8  |
| TULIPID120 | p40:5 PE | FMOC | 998.8  |
| TULIPID121 | 40:7 PE  | FMOC | 1010.9 |
| TULIPID122 | 40:6 PE  | FMOC | 1012.8 |
| TULIPID123 | 40:5 PE  | FMOC | 1014.7 |
| TULIPID124 | 40:4 PE  | FMOC | 1016.8 |
| TULIPID125 | 40:1 PE  | FMOC | 1022.8 |
| TULIPID126 | 16:1 SM  | NL50 | 735.6  |
| TULIPID127 | 16:0 SM  | NL50 | 737.6  |
| TULIPID128 | 18:1 SM  | NL50 | 763.6  |
| TULIPID129 | 18:0 SM  | NL50 | 765.6  |

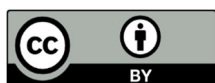

© 2020 by the authors. Licensee MDPI, Basel, Switzerland. This article is an open access article distributed under the terms and conditions of the Creative Commons Attribution (CC BY) license (<http://creativecommons.org/licenses/by/4.0/>).
